# Supplementary material for: A Lipid Emulsion Reverses Toxic-Dose Bupivacaine-Induced Vasodilation during Tyrosine Phosphorylation-Evoked Contraction in Isolated Rat Aortae
Source: MDPI journal article supplement (doi:10.3390/ijms18020394), 2017-02-13
Supplement: s1 [file s1]

# Supplementary Materials: A Lipid Emulsion Reverses Toxic-Dose Bupivacaine-Induced Vasodilation during Tyrosine Phosphorylation-Evoked Contraction in Isolated Rat Aortae

Seong-Ho Ok, Soo Hee Lee, Seong-Chun Kwon, Mun Hwan Choi, Il-Woo Shin, Sebin Kang, Miyeong Park, Jeong-Min Hong and Ju-Tae Sohn

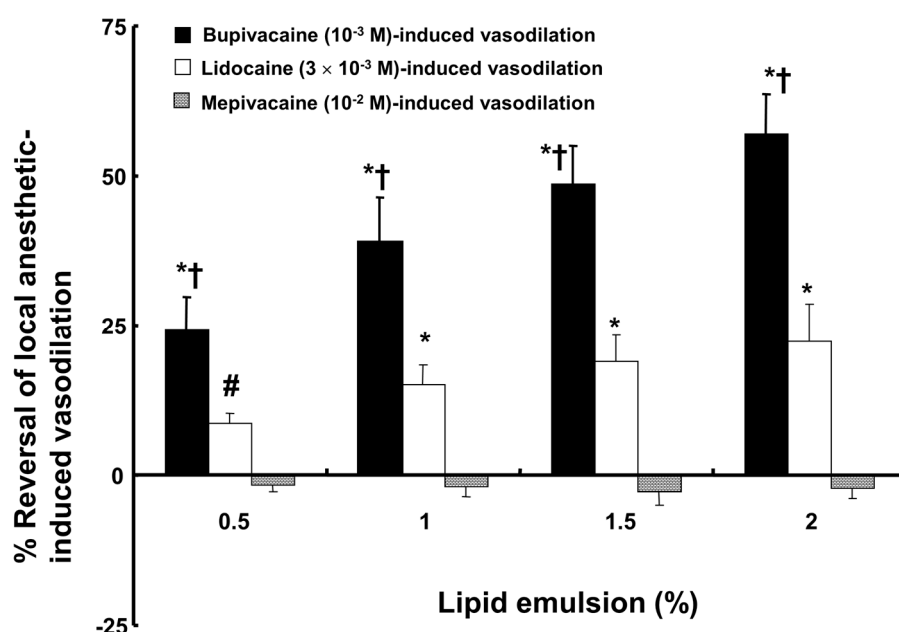

**Figure S1.** The magnitude of the lipid emulsion-mediated reversal of vasodilation induced by bupivacaine (10<sup>-3</sup> M, *N* = 5), lidocaine (3 × 10<sup>-3</sup> M, *N* = 5) and mepivacaine (10<sup>-2</sup> M, *N* = 5) during sodium orthovanadate (10<sup>-3</sup> M)-induced contraction in isolated endothelium-denuded rat aortae. The data represent the percentage of the reversal of local anesthetic-induced vasodilation from sodium orthovanadate-induced contraction. The magnitude of the lipid emulsion-mediated reversal of local anesthetic-induced vasodilation was analyzed using a two-way repeated-measures analysis of variance followed by Bonferroni's post hoc test. *N* indicates the number of rats from which descending thoracic aortic rings were derived. # *p* < 0.05 and \* *p* < 0.001 versus mepivacaine (10<sup>-2</sup> M)-induced vasodilation. † *p* < 0.001 versus lidocaine (3 × 10<sup>-3</sup> M)-induced vasodilation.
